# Supplementary material for: Catalyhtic asymmetric Henry reactions--a simple approach to optically active beta-nitro alpha-hydroxy esters.
Source: Royal Society of Chemistry journal article supplement (doi:10.1039/b105929g), 2001-10-18

## Analytical separation of enantiomers for ee-determination.

| Compound | Apparatus | Column                                | Conditions* | $\tau_{(\text{minor})}$ | $\tau_{(\text{major})}$ |
|----------|-----------|---------------------------------------|-------------|-------------------------|-------------------------|
| 1a       | GC        | Chromopack CP-Chiracil ( $\beta$ -PM) | -           | 23.4 min                | 24.1 min                |
| 1b       | GC        | Chromopack CP-Chiracil ( $\beta$ -PM) | -           | 9.1 min                 | 9.2 min                 |
| 1c       | HPLC      | Daicel Chiralpak AS                   | 95/5/1.0    | 14.7 min                | 16.8 min                |
| 1d       | HPLC      | Daicel Chiralpak AD                   | 94/6/1.0    | 13.1 min                | 15.5 min                |
| 1e       | HPLC      | Daicel Chiralcel OD                   | 90/10/1.0   | 11.0 min                | 14.1 min                |
| 1f       | HPLC      | Daicel Chiralcel OD                   | 95/5/1.0    | 47.9 min                | 50.7 min                |

\*hexane/<sup>i</sup>PrOH/flow rate [mL/min]

## HRMS (TOF-MS).

| Compound | Calculated mass (+Na <sup>+</sup> ) | Mass found (+Na <sup>+</sup> ) |
|----------|-------------------------------------|--------------------------------|
| 1a       | 200.0535                            | 200.0282                       |
| 1b       | 214.0691                            | 214.0536                       |
| 1c       | 276.0848                            | 276.0852                       |
| 1d       | 290.1004                            | 290.0999                       |
| 1e       | 262.0691                            | 262.0691                       |
| 1f       | 307.0542                            | 307.0540                       |

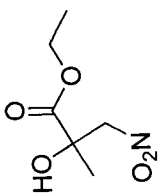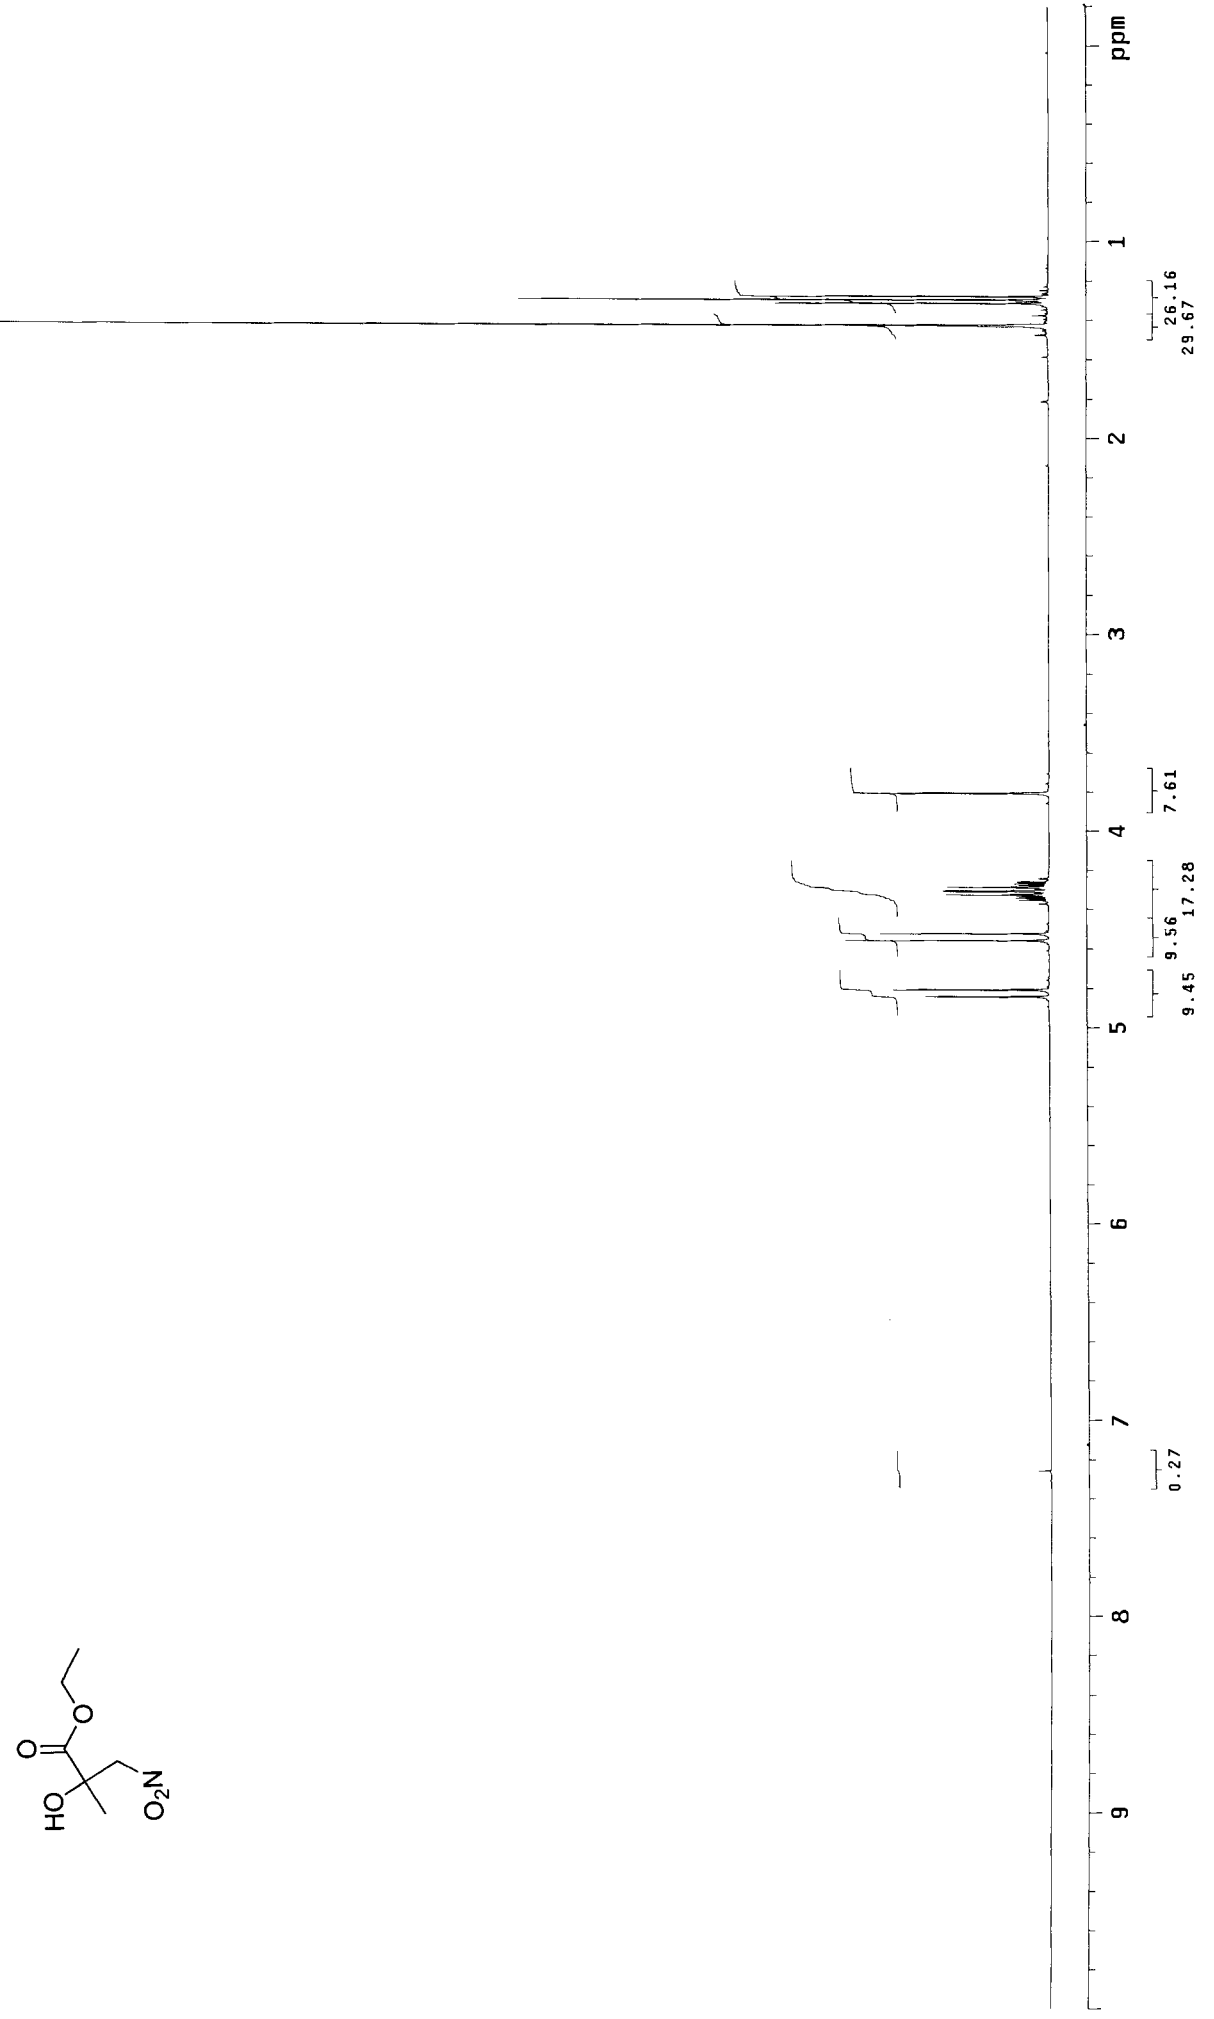

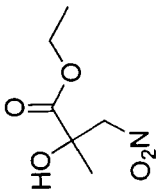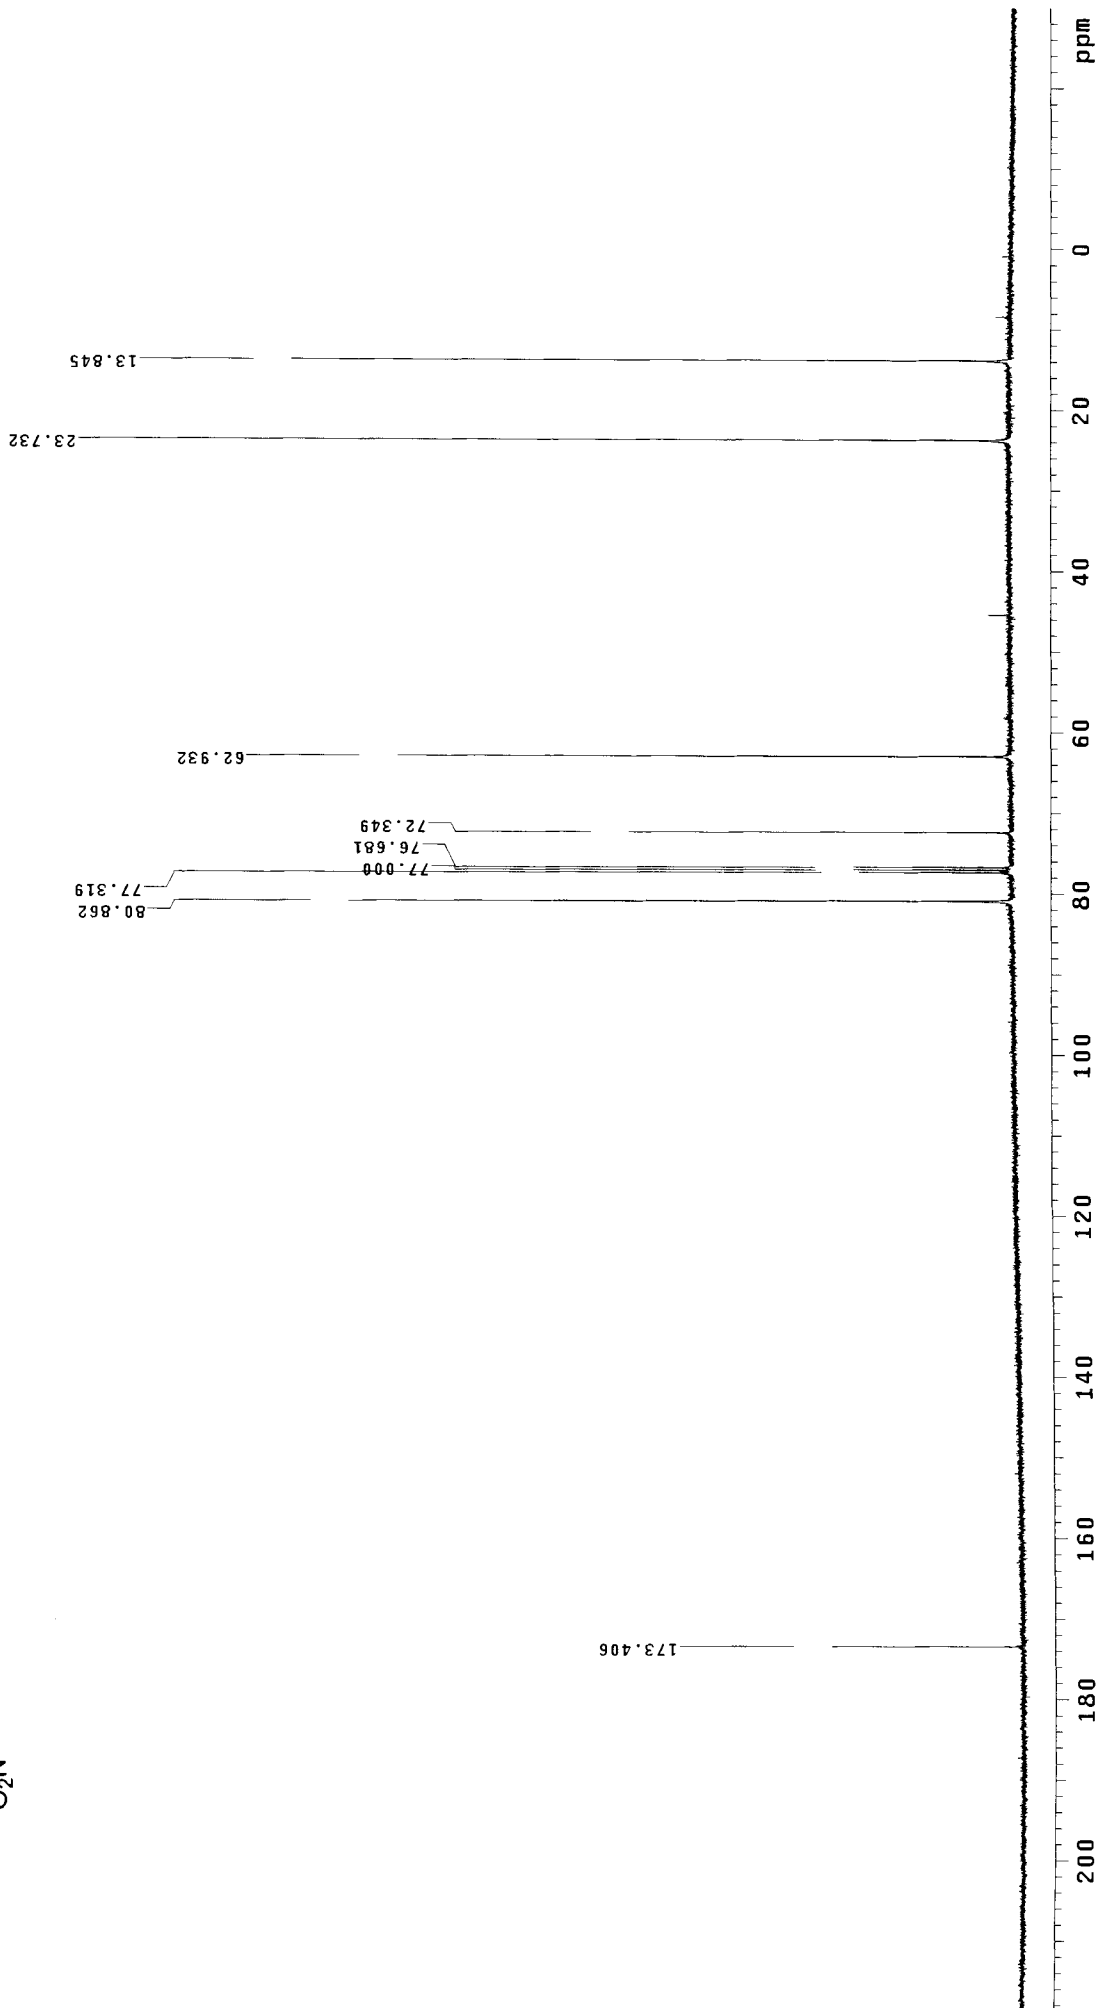

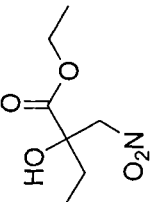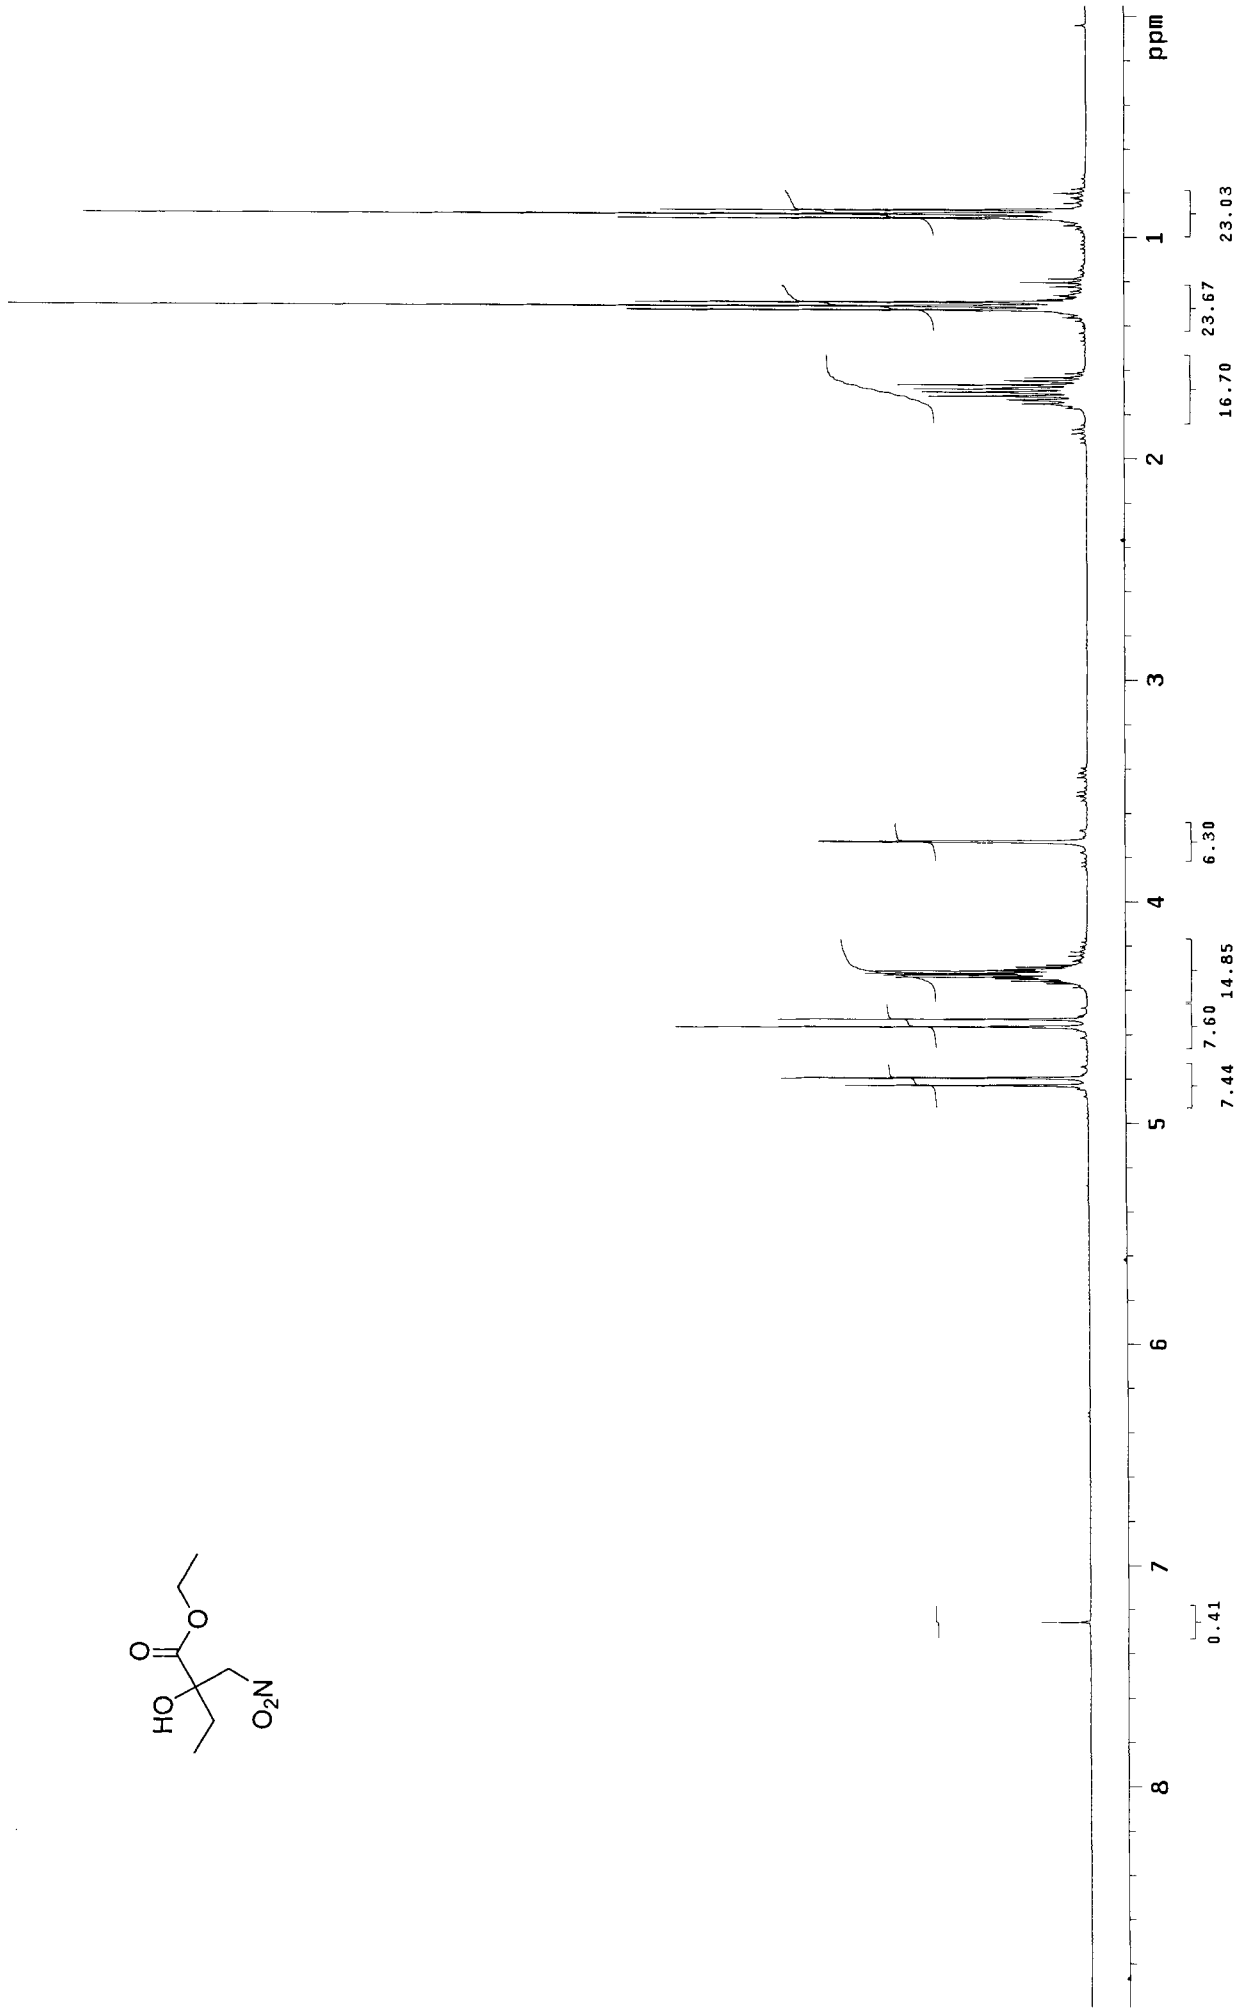

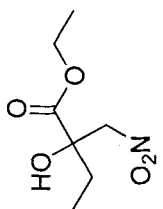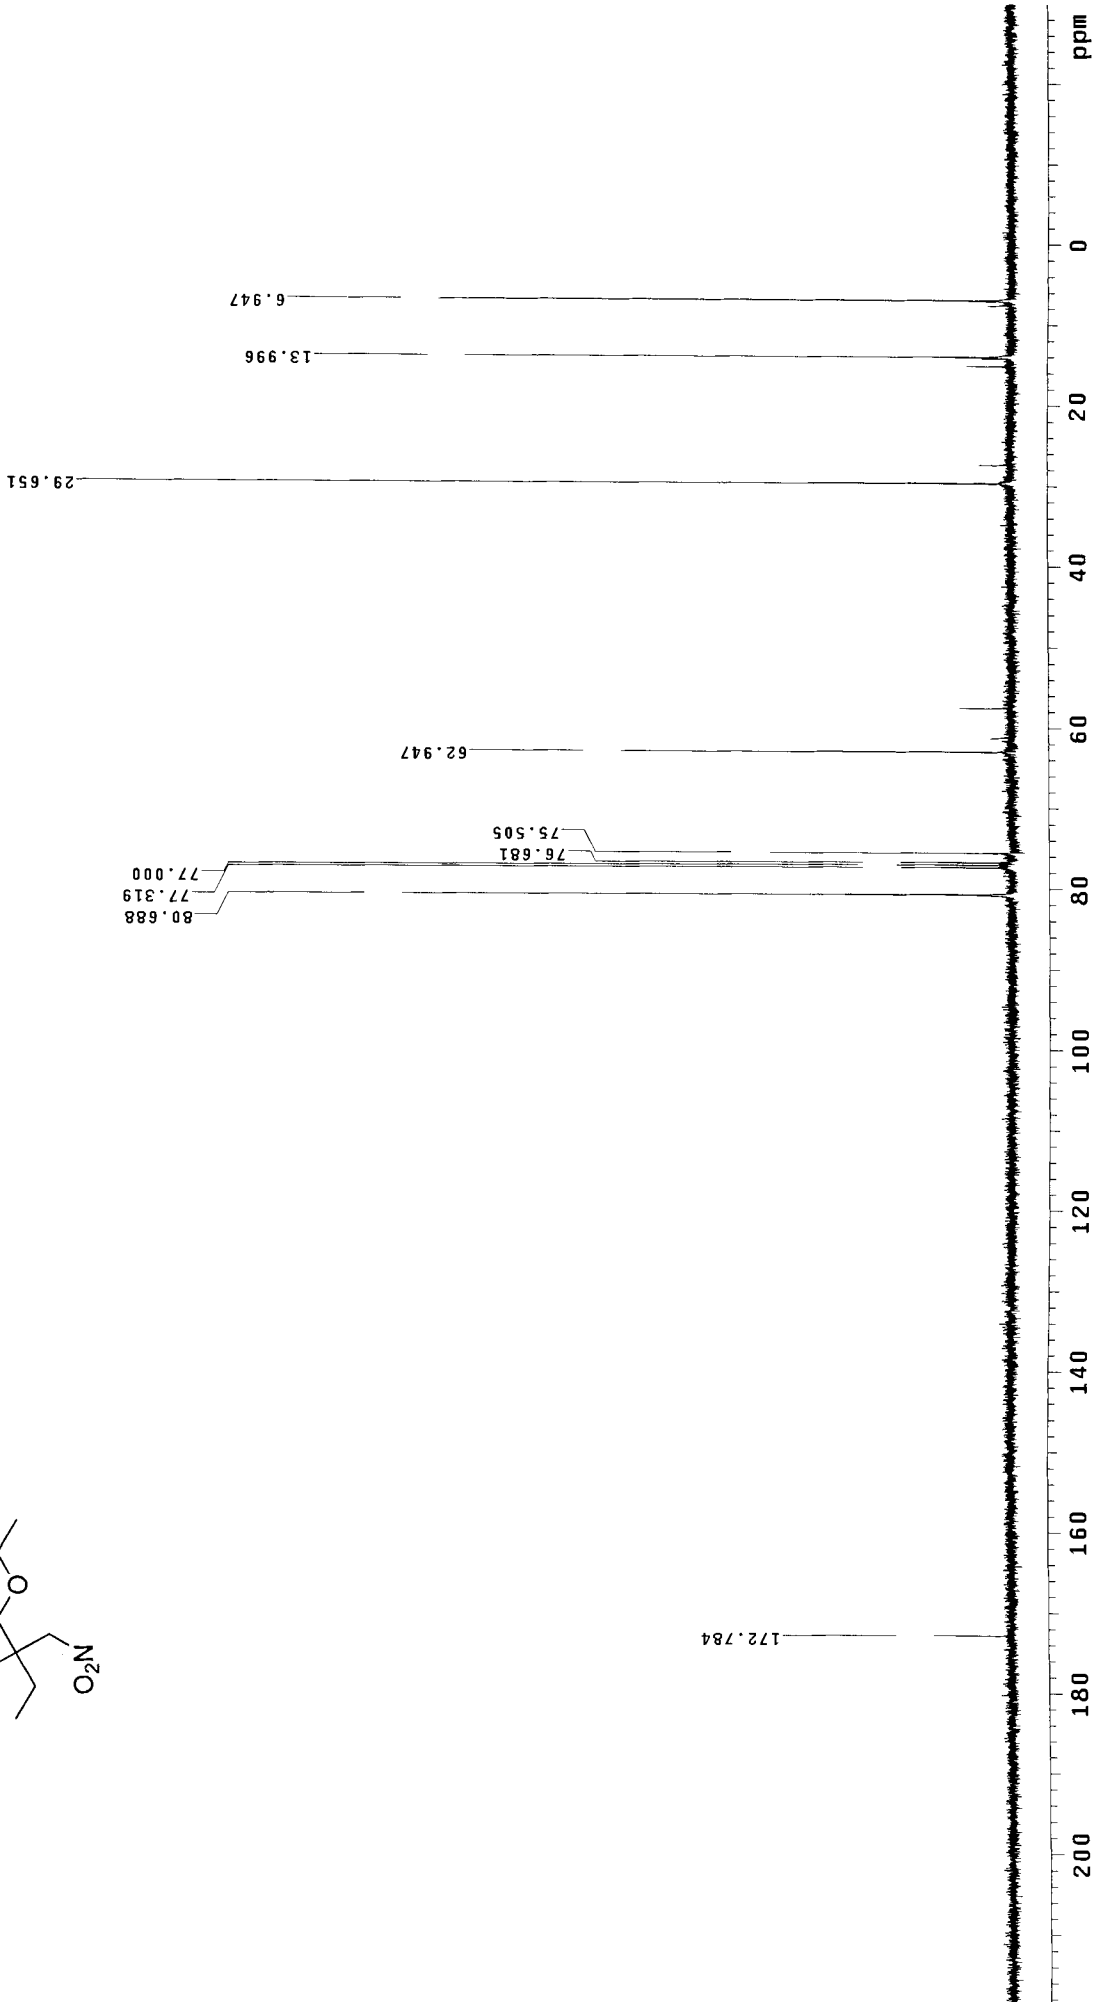

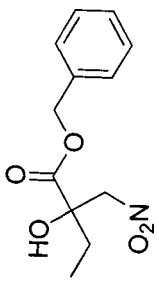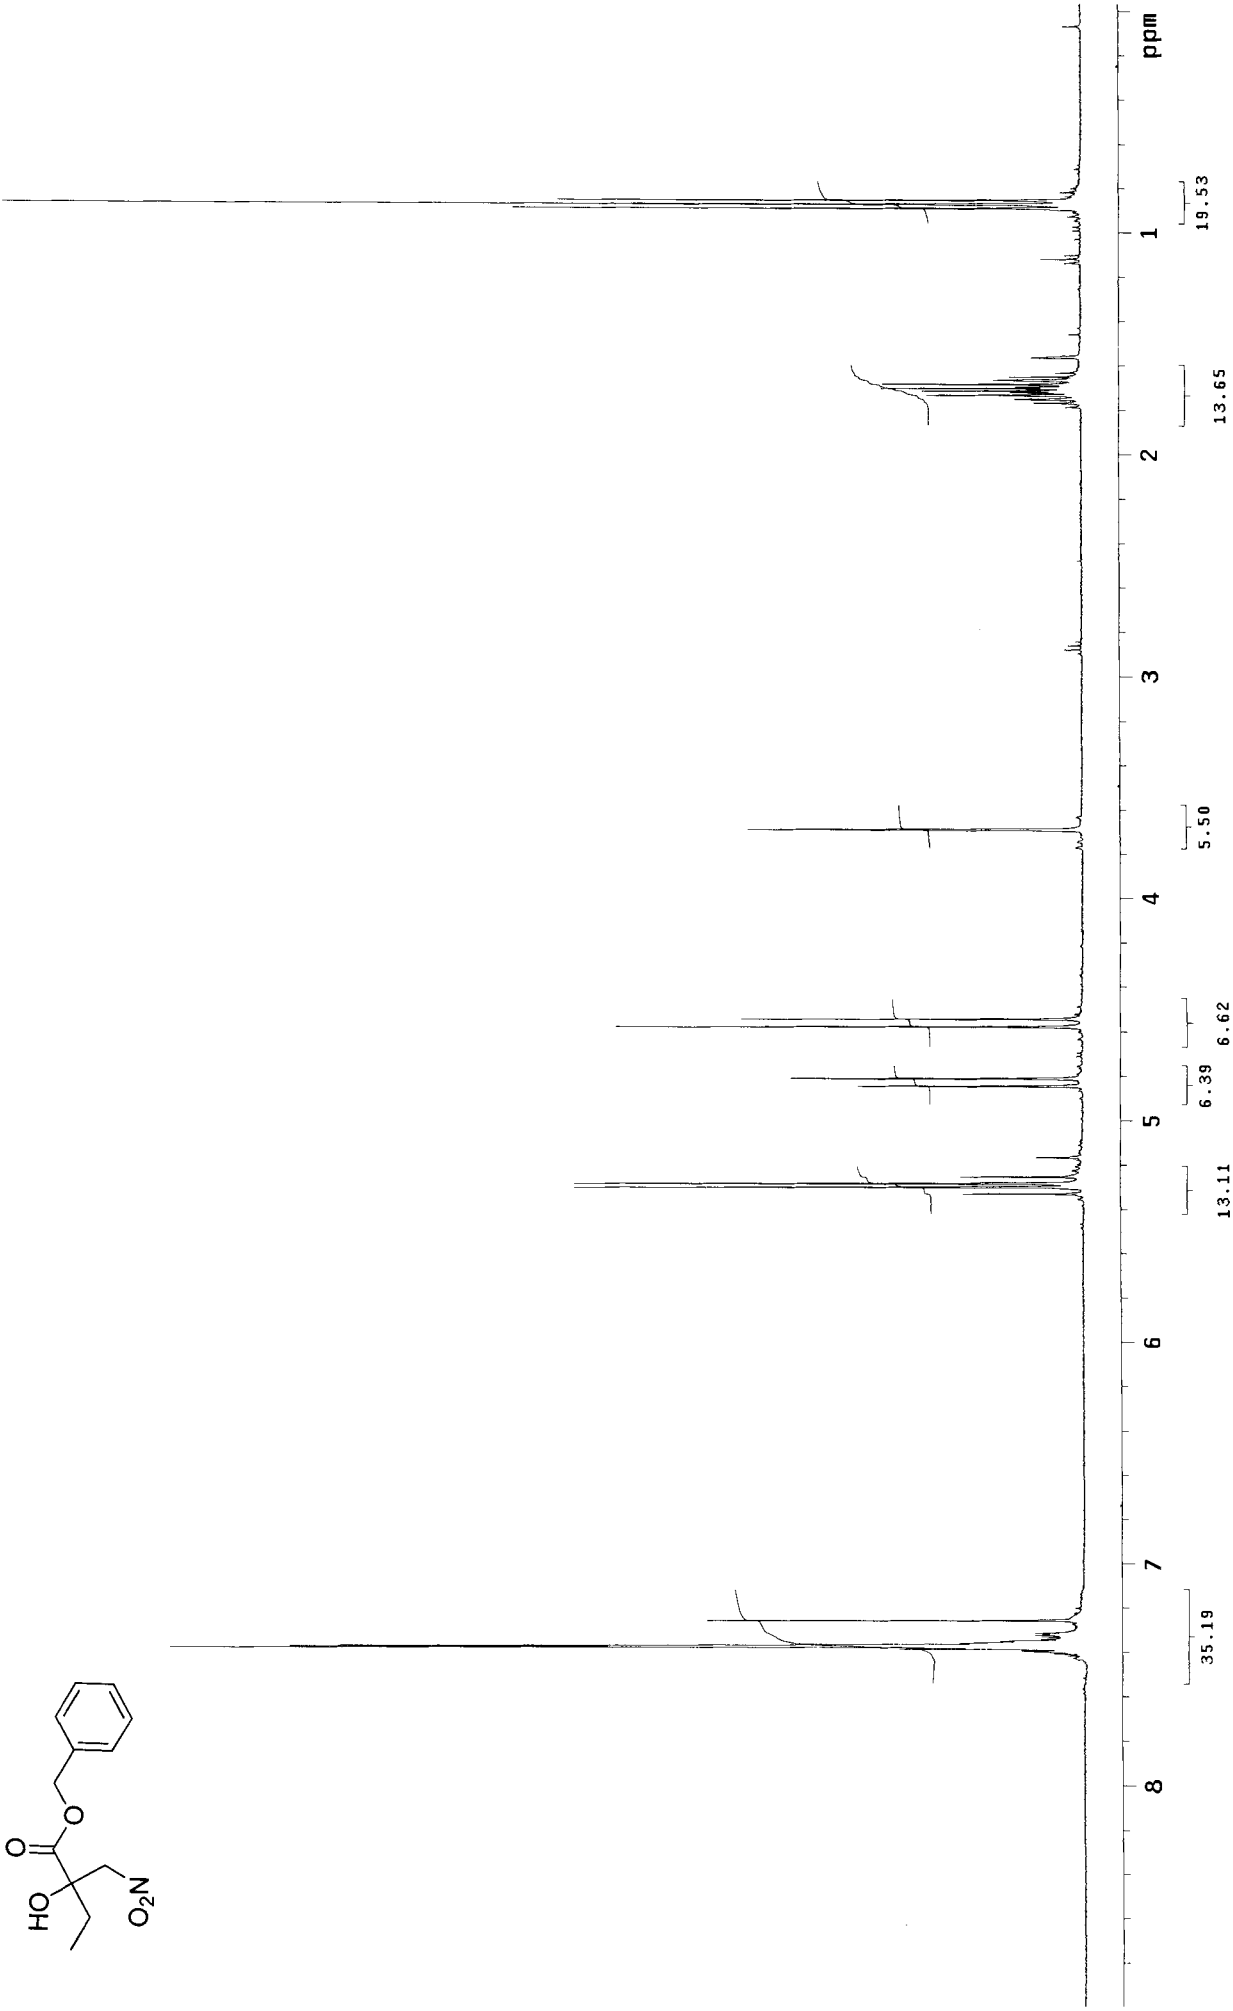

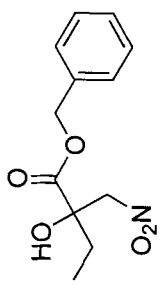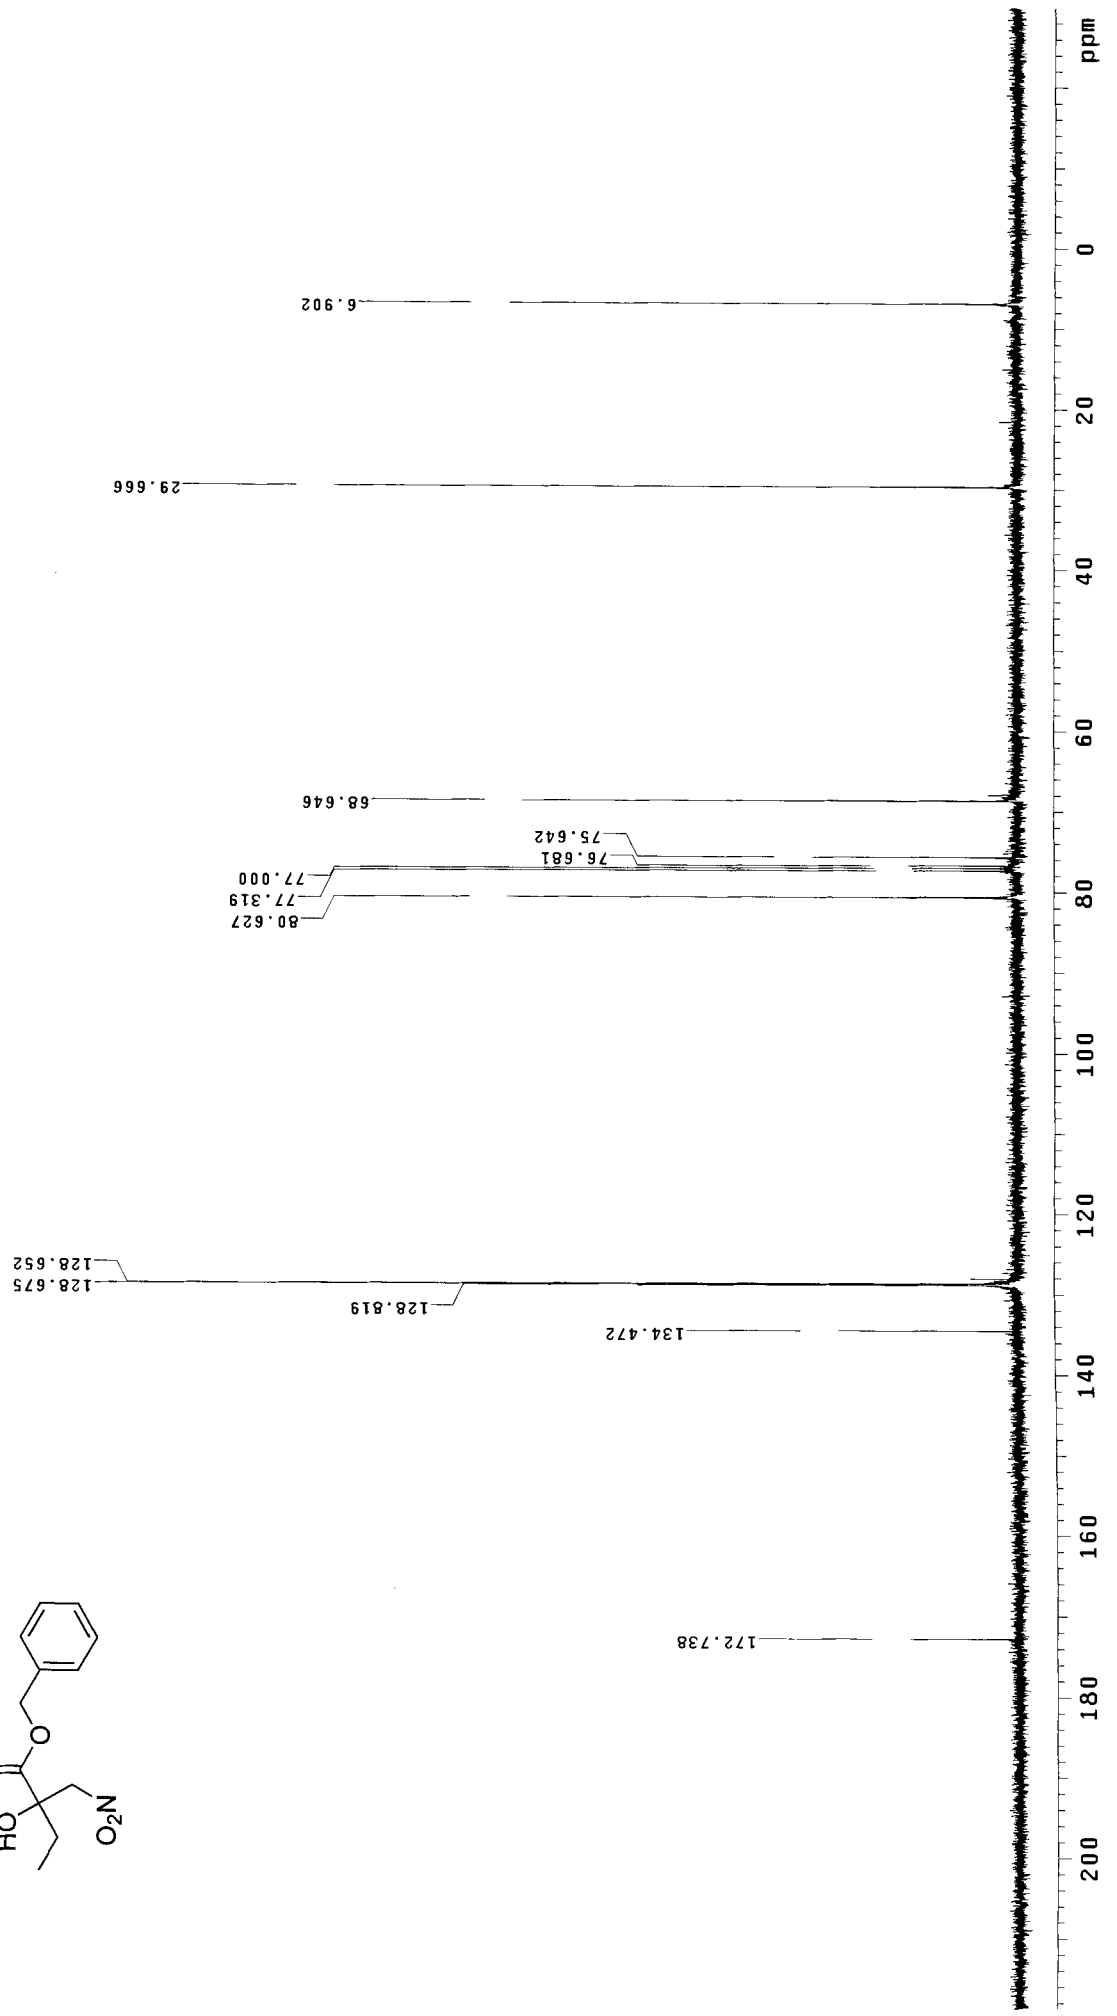

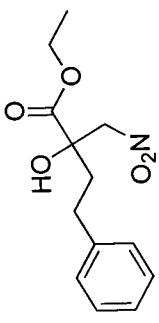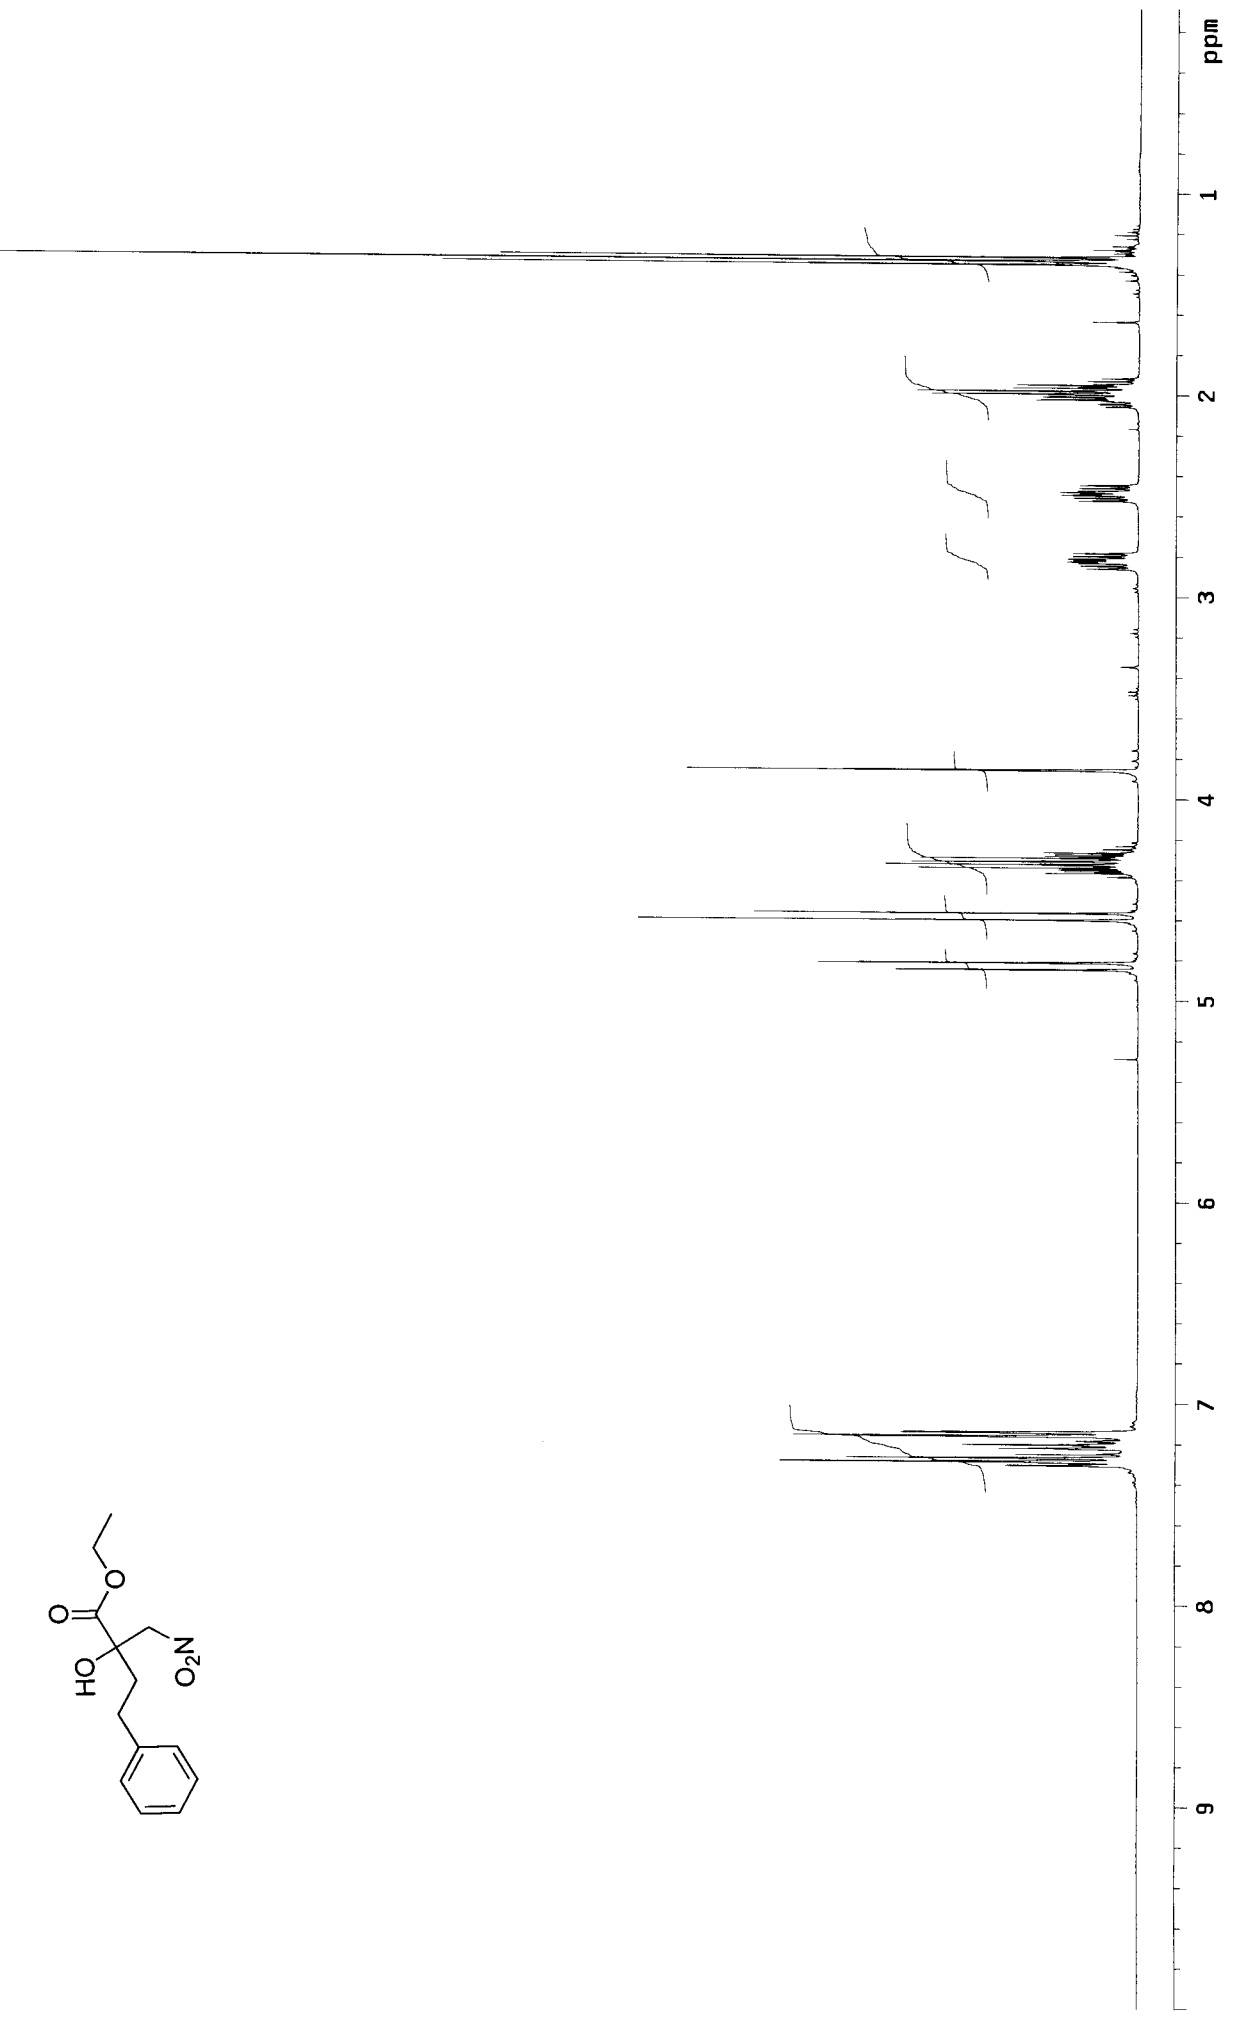



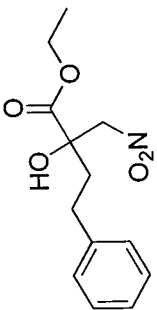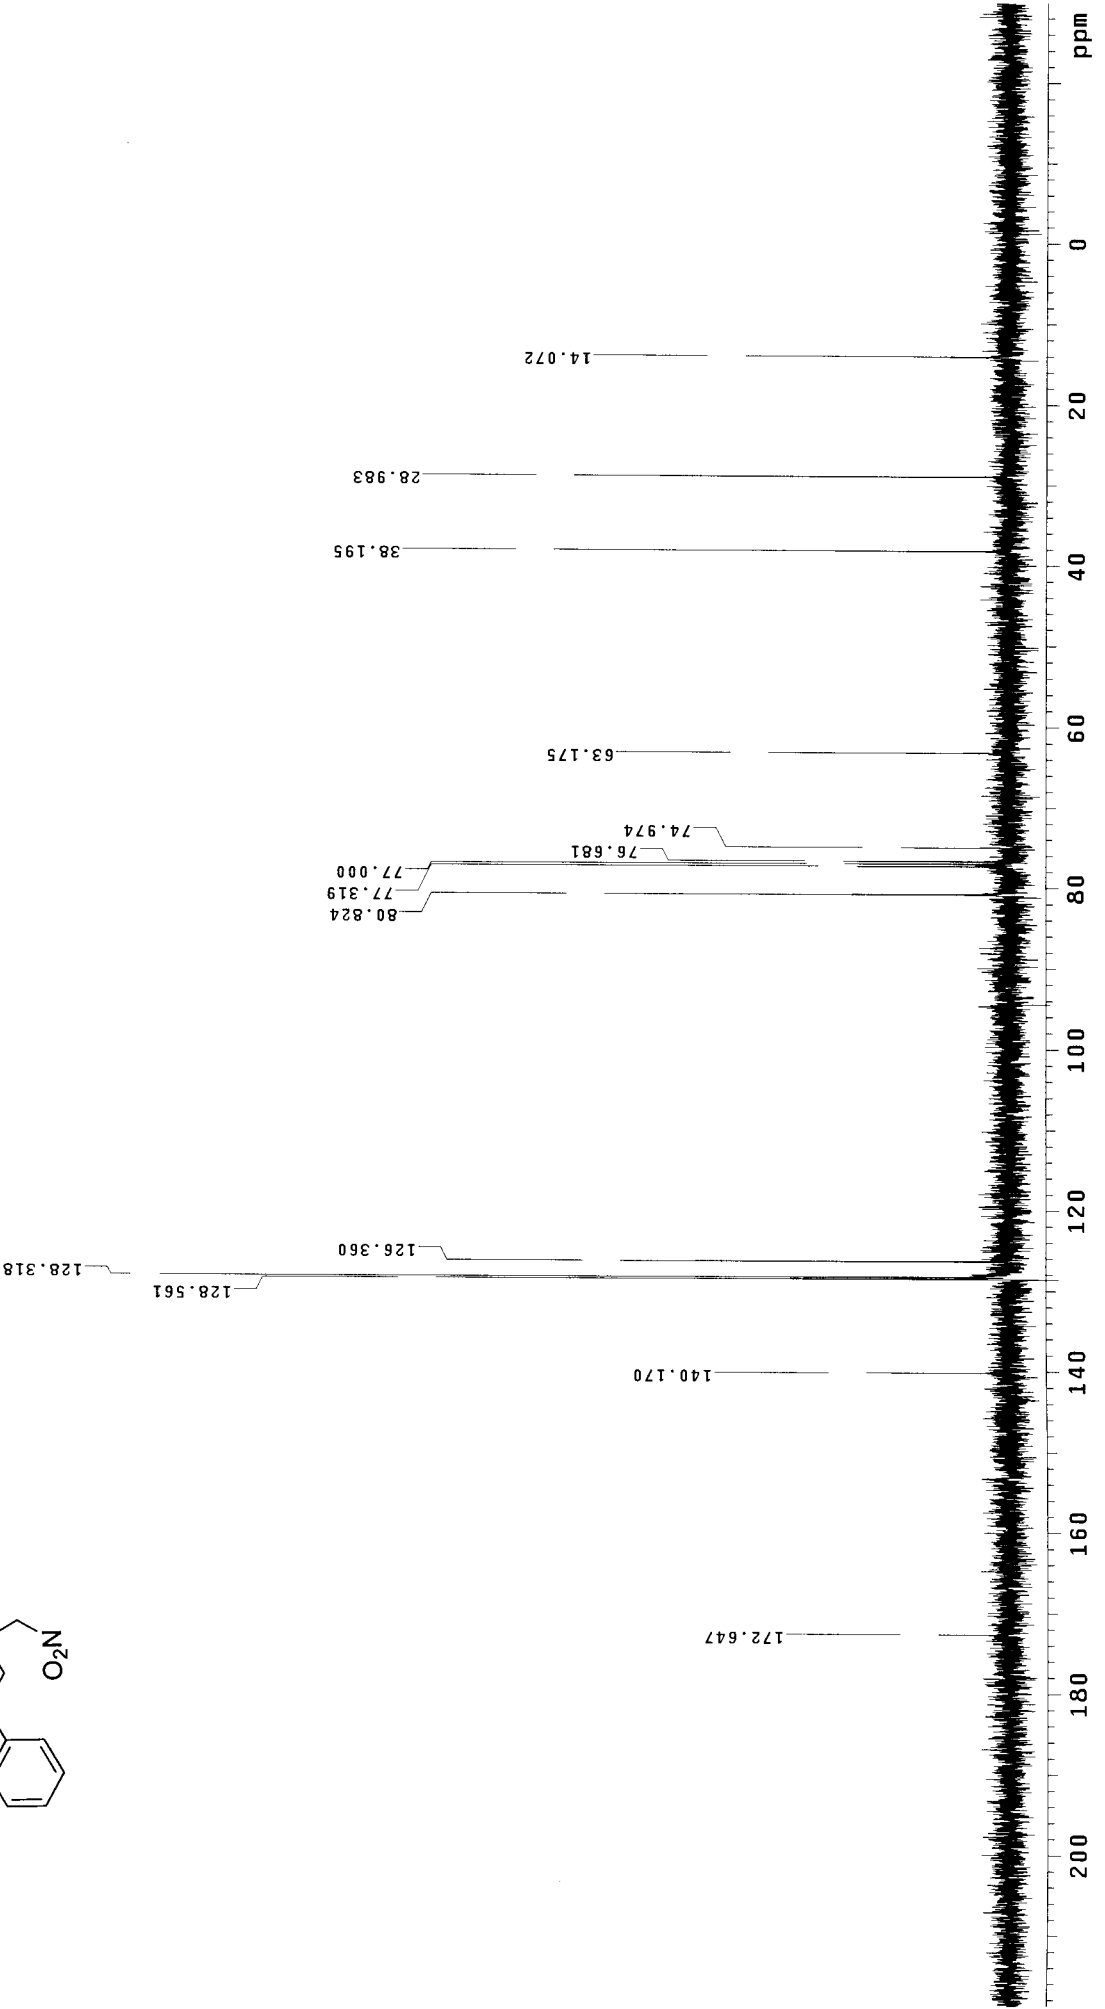

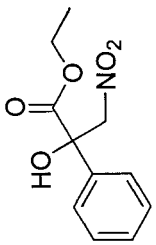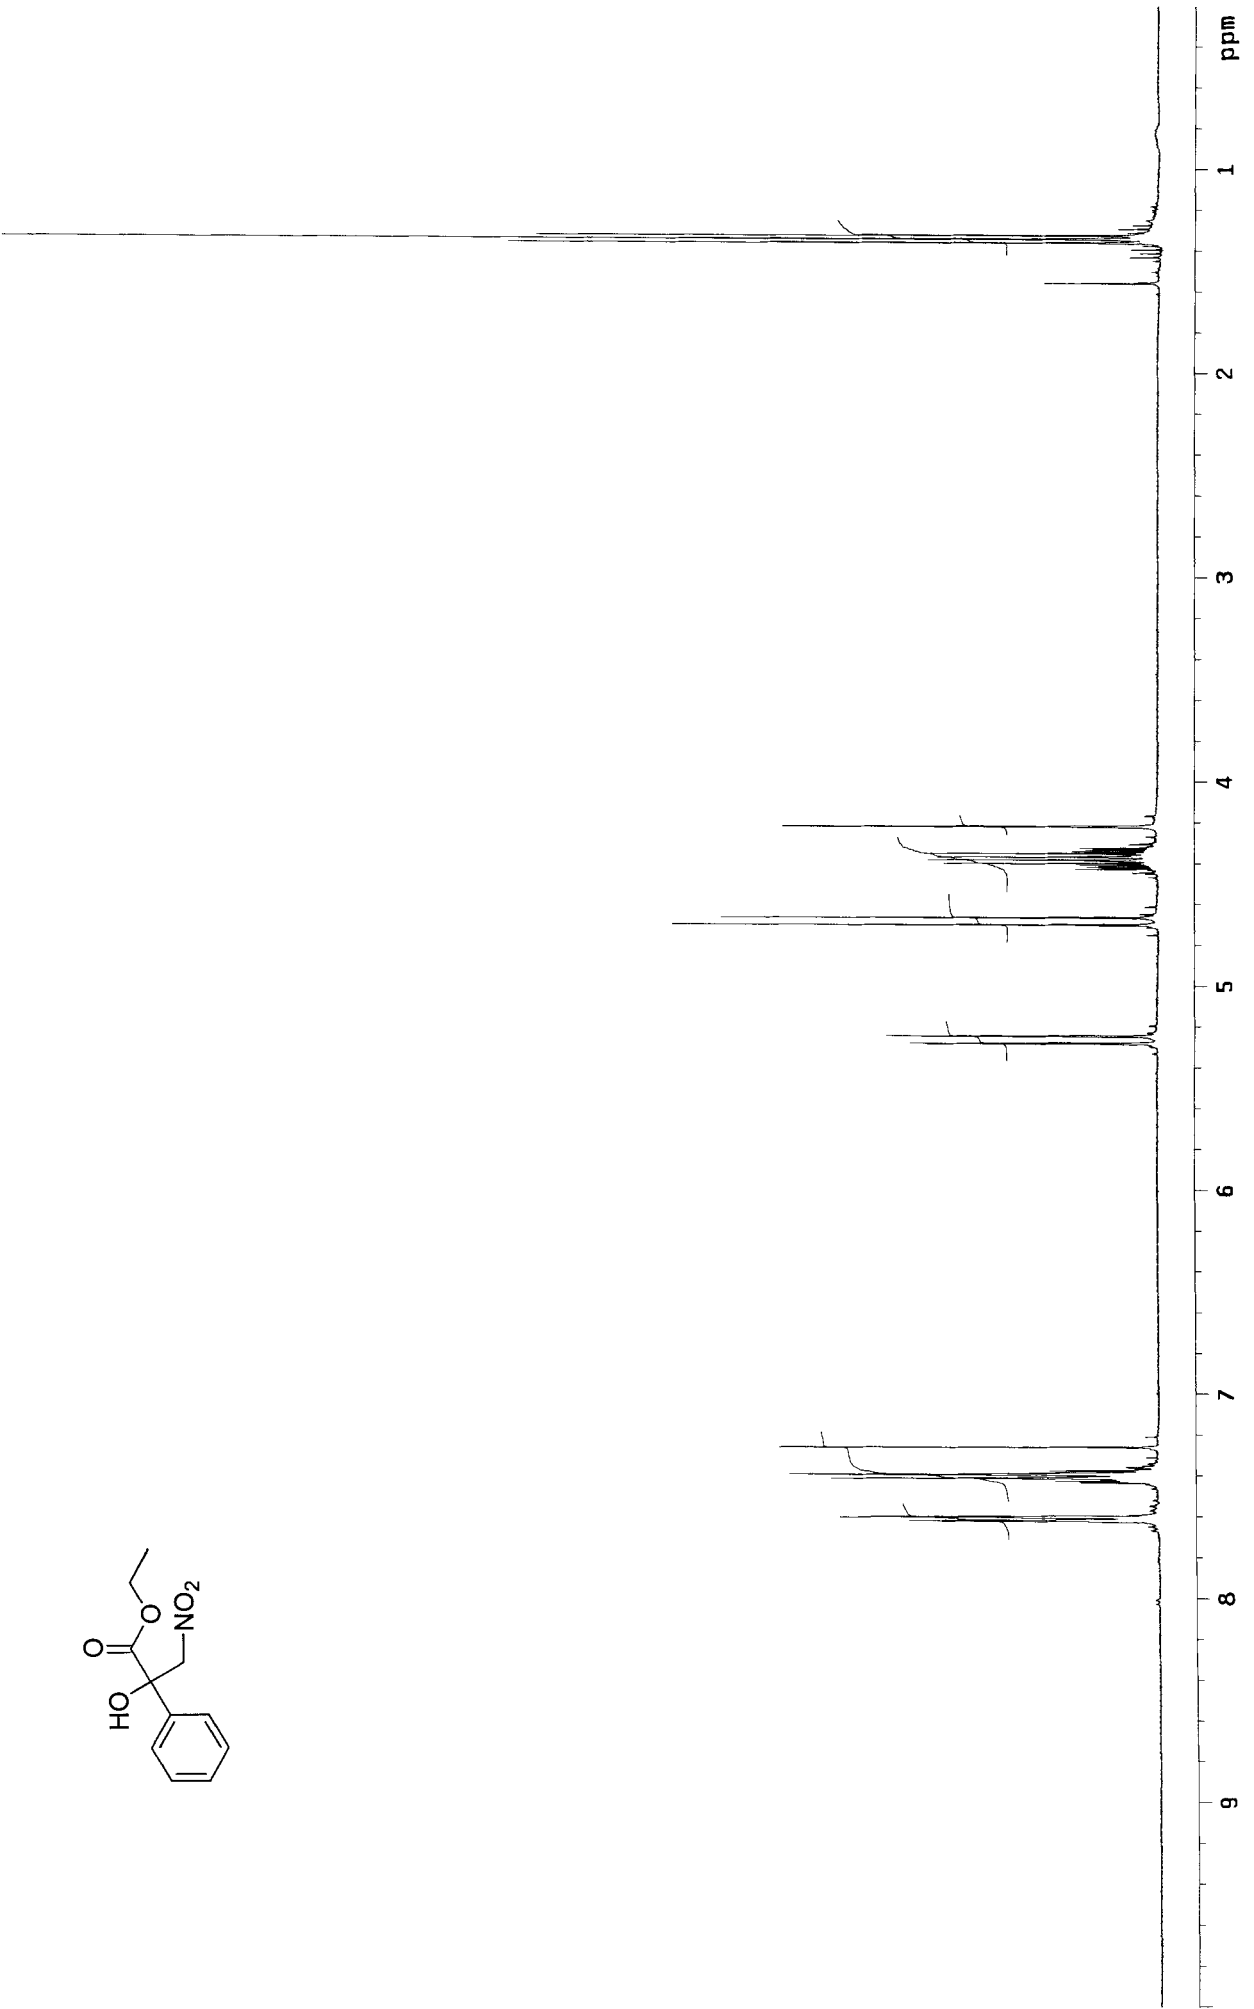

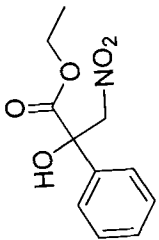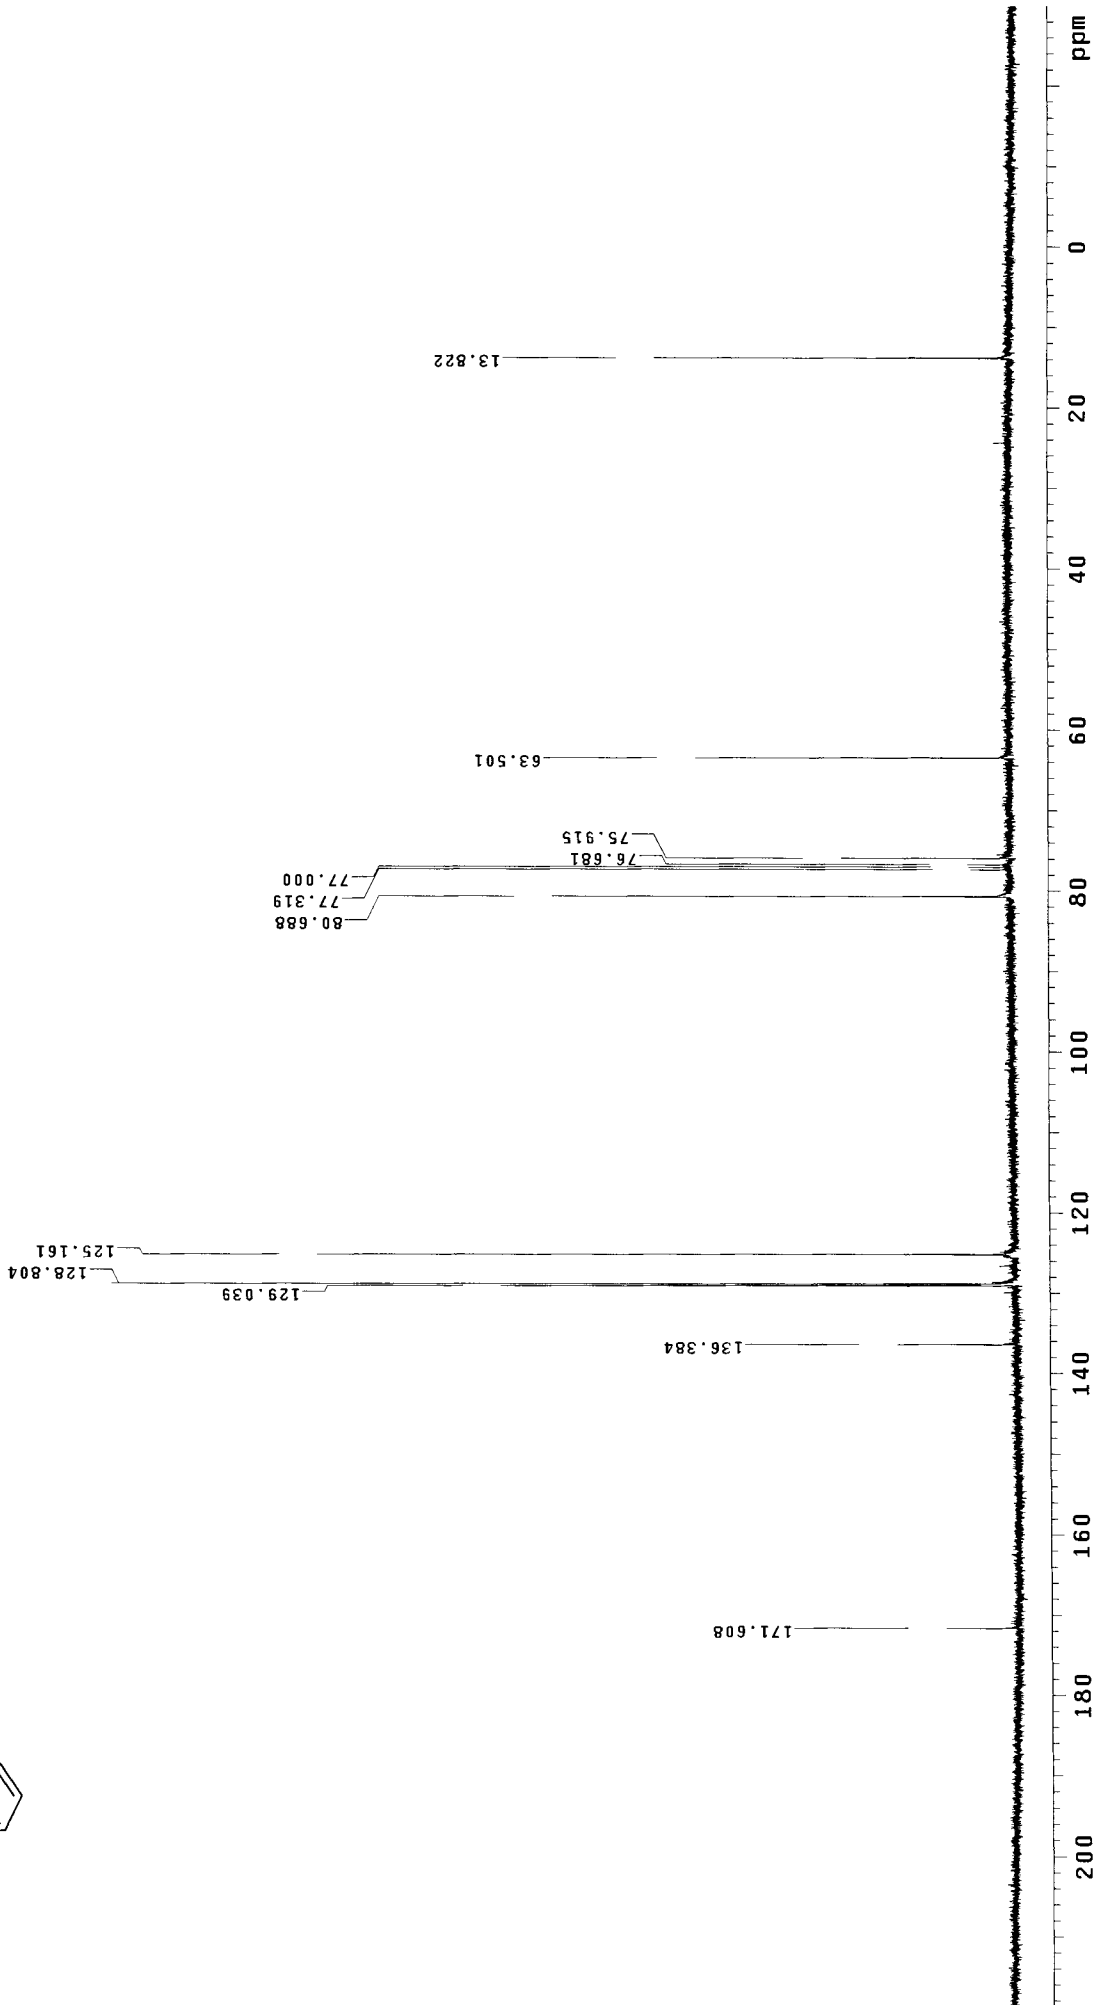

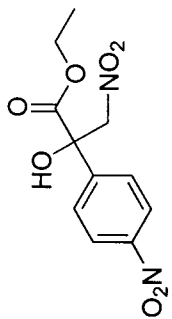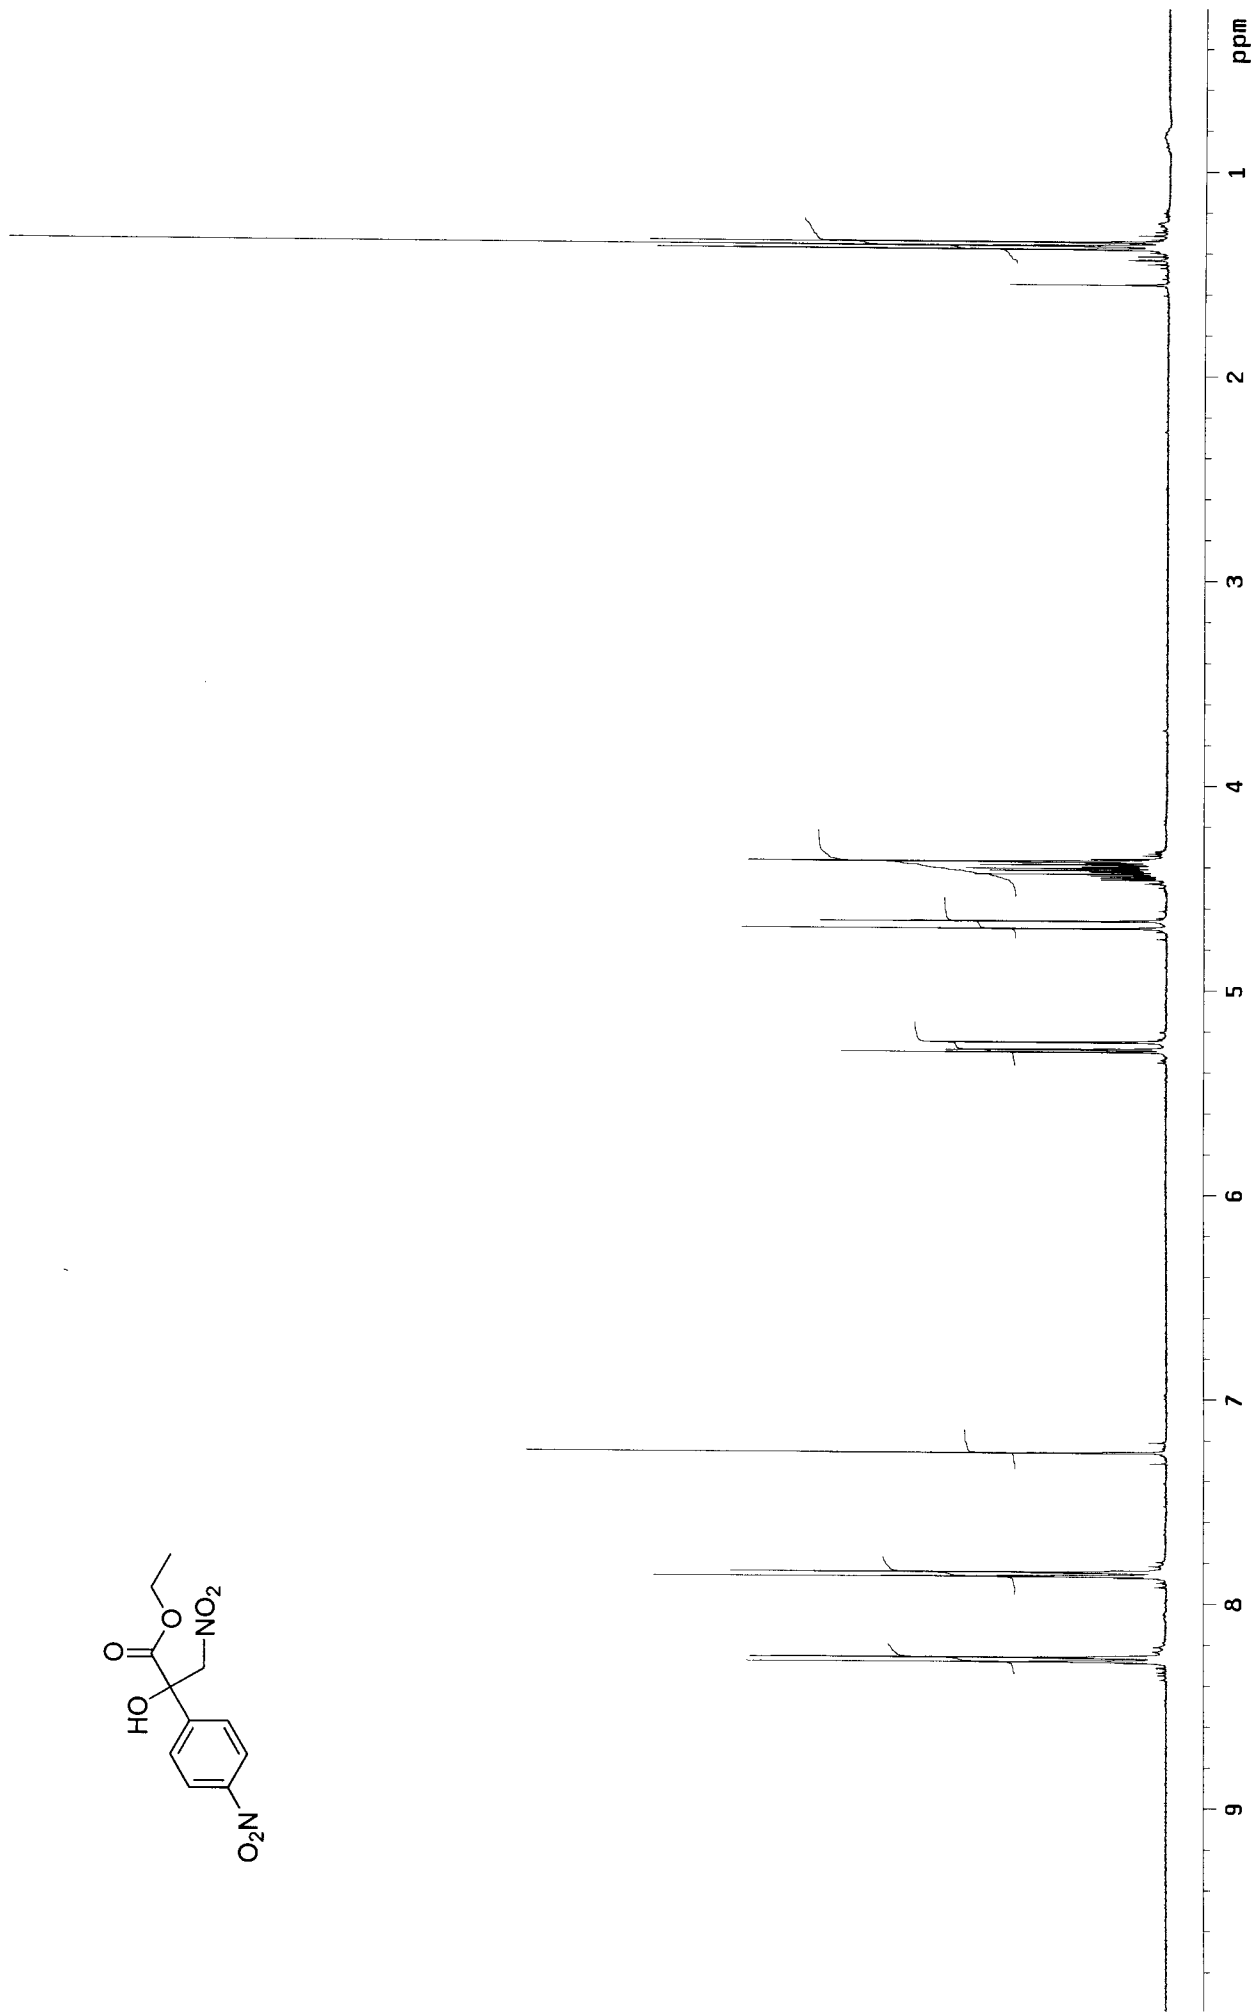

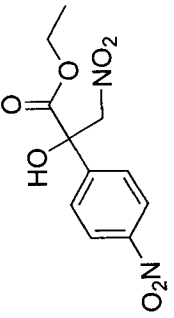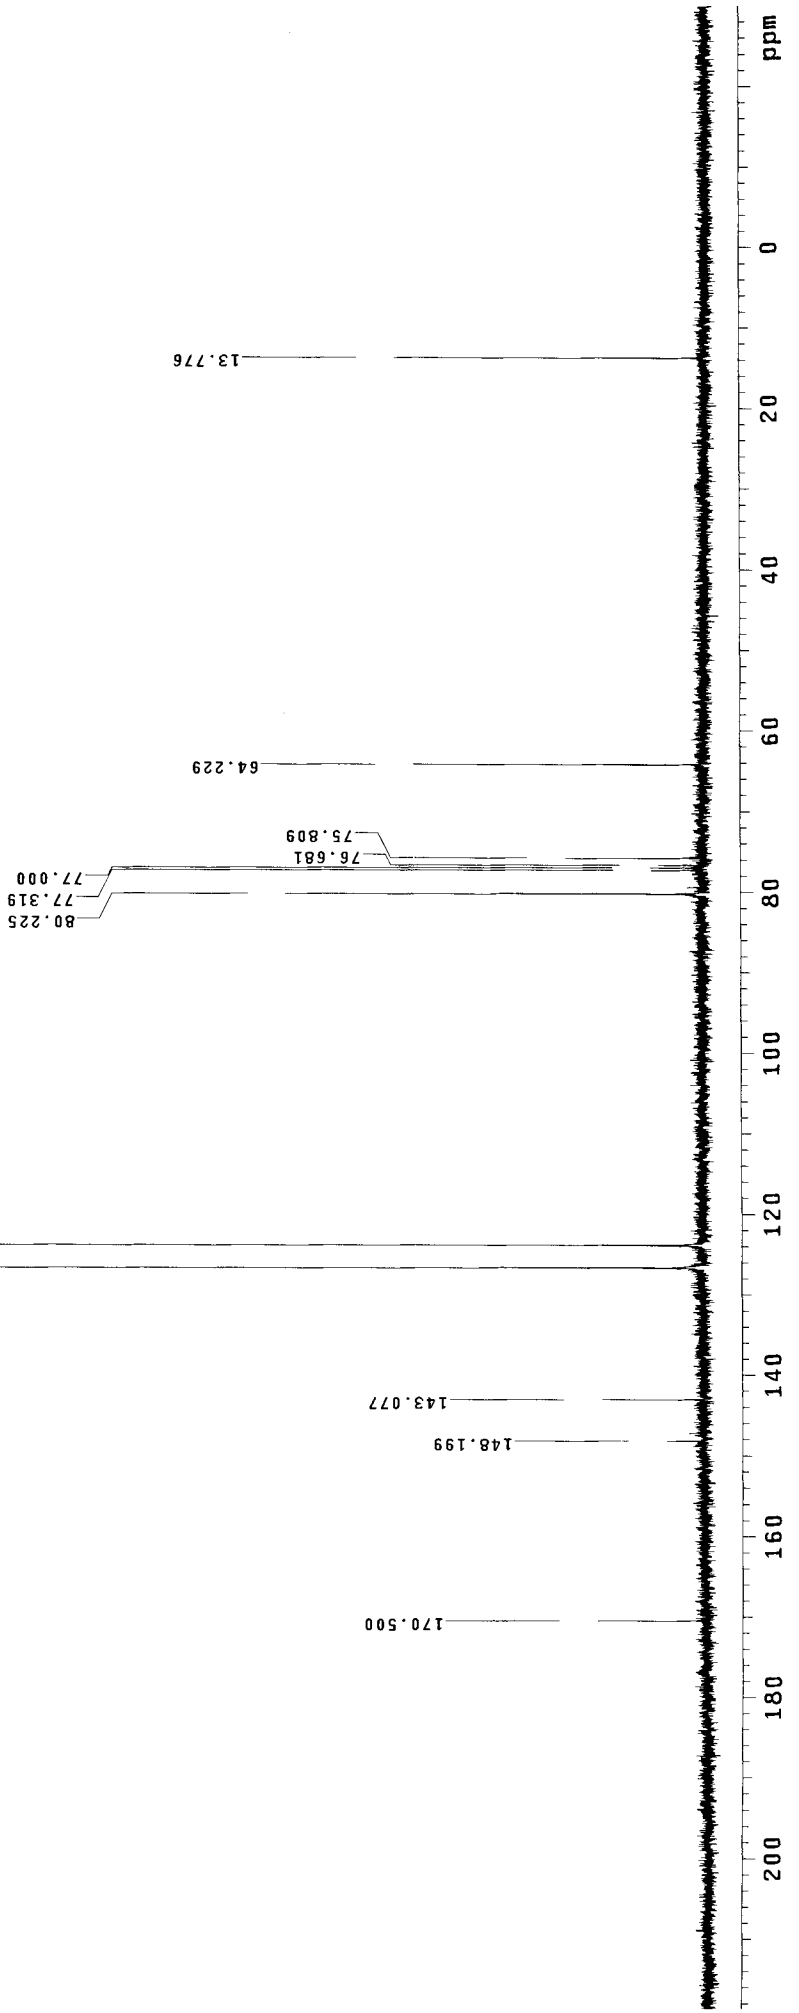

Supplement: b105929g.pdf [file b105929g.pdf]
